# Supplementary material
Source: MDPI journal article supplement (https://www.mdpi.com/2079-9292/10/9/988)
Supplement: s1 [file s1]

# Transparent all-oxide hybrid NiO:N/TiO<sub>2</sub> heterostructure for optoelectronic applications

Chrysa Aivalioti<sup>1,2</sup>, Alexandros Papadakis<sup>3</sup>, Emmanouil Manidakis<sup>1,2</sup>, Maria Kayambaki<sup>2</sup>, Maria Androulidaki<sup>2</sup>, Katerina Tsagaraki<sup>2</sup>, Nikolaos T. Pelekanos<sup>1,2</sup>, Constantin Stoumpos<sup>1</sup>, Mircea Modreanu<sup>4</sup>, Gabriel Crăciun<sup>5</sup>, Cosmin Romanitan<sup>5</sup>, Elias Aperathitis<sup>2,\*</sup>

- <sup>1</sup> Department of Materials Science and Technology, University of Crete, P.O. Box 2208, 71003 Heraklion, Crete, Greece; chr.aivalioti@materials.uoc.gr (C.A.); mman@materials.uoc.gr (E.M.); pelekano@materials.uoc.gr (N.T.P.); cstoumpos@materials.uoc.gr (C.S.)
  - <sup>2</sup> Microelectronics Research Group, Institute of Electronic Structure and Laser, Foundation for Research and Technology (FORTH-Hellas), P.O. Box 1385, 70013 Heraklion, Crete, Greece; mmic@physics.uoc.gr (M.K.); pyrhnas@physics.uoc.gr (M.A.); ktsag@physics.uoc.gr (K.T.)
  - <sup>3</sup> Physics Department, University of Crete, P.O. Box 2208, 71003 Heraklion, Crete, Greece; ph3916@edu.physics.uoc.gr
  - <sup>4</sup> Tyndall National Institute-University College Cork, Lee Maltings, Dyke Parade, T12 R5CP Cork, Ireland; mircea.modreanu@tyndall.ie
  - <sup>5</sup> National Institute for Research and Development in Microtechnologies-IMT, 077190 Bucharest, Romania; craciunster@gmail.com (G.C.); romanitan.cosmin@gmail.com (C.R.)
- \* Correspondence: eaper@physics.uoc.gr

Compact and mesoporous TiO<sub>2</sub> films were fabricated by spin coating following the standard procedure used when these layers are to be used as electron transfer layers for perovskites PVs. After the cleaning process of the FTO/glass substrate the compact TiO<sub>2</sub> (c-TiO<sub>2</sub>) film, having a thickness of around 60 nm, was formed which was followed by thermal treatment at 500°C for 15min in air ambient. A commercially available TiO<sub>2</sub> mesoporous paste was used to form the mesoporous (m-) TiO<sub>2</sub> on top of the c-TiO<sub>2</sub>/FTO/glass substrate. The m-TiO<sub>2</sub> layer formed was around 200nm thick which was afterward annealed at 500°C for 15min in air. The roughness of the m-TiO<sub>2</sub> surface was deduced from Atomic Force Microscopy (AFM) measurements and the results of such AFM measurements are seen in Figure S1. The RMS (root-mean-square) roughness for two different areas (3 μm x 3 μm and 10 μm x 10 μm) were 19.87 nm and 21.27 nm, respectively.

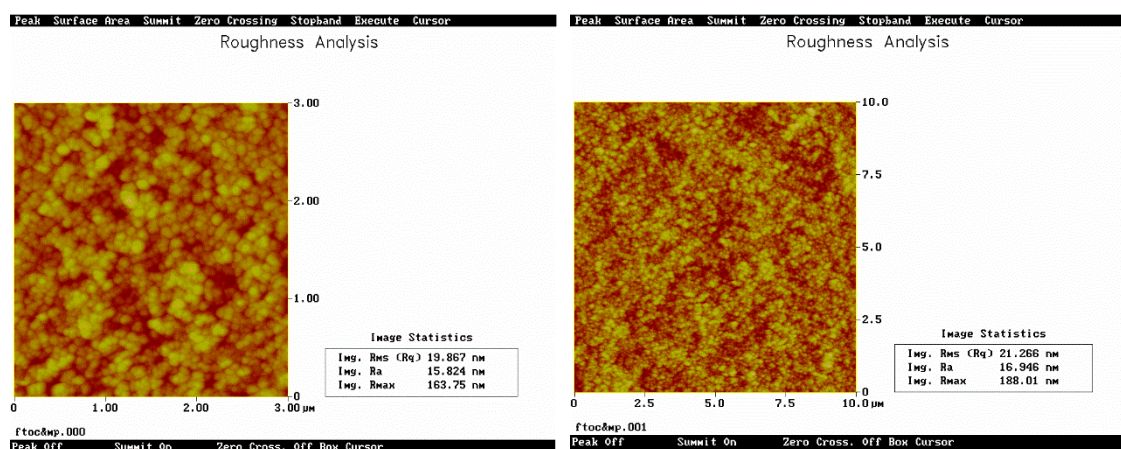

Figure S1. AFM measurements results of glass/FTO/c-TiO<sub>2</sub>/m-TiO<sub>2</sub> (500C)
